# Supplementary material
Source: Elsevier journal article supplement (https://www.sciencedirect.com/science/article/pii/S1138359321002227)
Supplement: mmc1 [file S1138359321002227:mmc1.docx]

**Apéndice A: Artículos más citados**

Tabla 5: Artículos más citados

| **Título** | **Fuente** | **Tipo** | **Citas / año** | **Año** |
| --- | --- | --- | --- | --- |
| Tethered to the EHR: Primary Care Physician Workload Assessment Using EHR Event Log Data and TimeMotion Observations | Ann. Fam. Med. | Article | 34,7 | 2017 |
| Obesity Statistics | Primary Care | Review | 29,8 | 2016 |
| Geographic and Specialty Distribution of US Physicians Trained to Treat Opioid Use Disorder | Ann. Fam. Med. | Article | 28,2 | 2015 |
| Deprescribing proton pump inhibitors Evidence-based clinical practice guideline | Can. Fam. Phys. | Article | 25,0 | 2017 |
| The influence of gender and other patient characteristics on health care-seeking behaviour: a QUALICOPC study | BMC Fam. Pract. | Article | 21,3 | 2016 |
| Prescription Opioid Use among Adults with Mental Health Disorders in the United States | J. Am. Board Fam. Med. | Article | 20,7 | 2017 |
| Integrating Quantitative and Qualitative Results in Health Science Mixed Methods Research Through Joint Displays | Ann. Fam. Med. | Article | 20,0 | 2015 |
| Series: Practical guidance to qualitative research. Part 4: Trustworthiness and publishing | Eur. J. Gen. Pract. | Article | 19,3 | 2017 |
| Deprescribing benzodiazepine receptor agonists Evidence-based clinical practice guideline | Can. Fam. Phys. | Article | 17,5 | 2018 |
| Simplified guideline for prescribing medical cannabinoids in primary care | Can. Fam. Phys. | Article | 17,5 | 2018 |
| Clinical inertia to insulin initiation and intensification in the UK: A focused literature review | Prim. Care Diabetes | Review | 17,0 | 2017 |
| Deprescribing antipsychotics for behavioural and psychological symptoms of dementia and insomnia Evidence-based clinical practice guideline | Can. Fam. Phys. | Article | 17,0 | 2018 |
| More Comprehensive Care Among Family Physicians is Associated with Lower Costs and Fewer Hospitalizations | Ann. Fam. Med. | Article | 16,2 | 2015 |
| Device errors in asthma and COPD: systematic literature review and meta-analysis | npj Prim. Care Respir. Med. | Review | 15,3 | 2017 |
| Multiple physical and mental health comorbidity in adults with intellectual disabilities: population-based cross-sectional analysis | BMC Fam. Pract. | Article | 15,0 | 2015 |
| Prescription Opioid Duration, Dose, and Increased Risk of Depression in 3 Large Patient Populations | Ann. Fam. Med. | Article | 15,0 | 2016 |
| Series: Practical guidance to qualitative research. Part 3: Sampling, data collection and analysis | Eur. J. Gen. Pract. | Article | 15,0 | 2017 |
| The epidemiology of multimorbidity in primary care: a retrospective cohort study | Br. J. Gen. Pract. | Article | 15,0 | 2018 |
| Systematic review of systematic reviews for medical cannabinoids Pain, nausea and vomiting, spasticity, and harms | Can. Fam. Phys. | Review | 15,0 | 2018 |
| Primary care of adults with intellectual and developmental disabilities 2018 Canadian consensus guidelines | Can. Fam. Phys. | Article | 14,5 | 2018 |
| Efficacy and Acceptability of Pharmacological Treatments for Depressive Disorders in Primary Care: Systematic Review and Network Meta-Analysis | Ann. Fam. Med. | Review | 14,4 | 2015 |
| Barriers Rural Physicians Face Prescribing Buprenorphine for Opioid Use Disorder | Ann. Fam. Med. | Article | 14,3 | 2017 |
| Effectiveness of Psychological Treatments for Depressive Disorders in Primary Care: Systematic Review and Meta-Analysis | Ann. Fam. Med. | Review | 14,0 | 2015 |
| The PCORI Engagement Rubric: Promising Practices for Partnering in Research | Ann. Fam. Med. | Article | 14,0 | 2017 |
| SGLT2 inhibitors and renal outcomes in type 2 diabetes with or without renal impairment: A systematic review and meta-analysis | Prim. Care Diabetes | Review | 13,5 | 2018 |
| Persistent problems 1 year after mild traumatic brain injury: a longitudinal population study in New Zealand | Br. J. Gen. Pract. | Article | 13,0 | 2016 |
| Electronic consultation systems: worldwide prevalence and their impact on patient care-a systematic review | Fam. Pr. | Review | 13,0 | 2016 |
| Deprescribing antihyperglycemic agents in older persons Evidence-based clinical practice guideline | Can. Fam. Phys. | Article | 13,0 | 2017 |
| Point-of-Care Ultrasound in General Practice: A Systematic Review | Ann. Fam. Med. | Article | 13,0 | 2019 |
| Health Coaching by Medical Assistants to Improve Control of Diabetes, Hypertension, and Hyperlipidemia in Low-Income Patients: A Randomized Controlled Trial | Ann. Fam. Med. | Article | 12,8 | 2015 |
| Impact of Scribes on Physician Satisfaction, Patient Satisfaction, and Charting Efficiency: A Randomized Controlled Trial | Ann. Fam. Med. | Article | 12,7 | 2017 |
| Impact of and Satisfaction with a New eConsult Service: A Mixed Methods Study of Primary Care Providers | J. Am. Board Fam. Med. | Article | 12,6 | 2015 |
| Overdiagnosis of asthma in children in primary care: a retrospective analysis | Br. J. Gen. Pract. | Article | 12,5 | 2016 |
| Diabetic Retinopathy | Primary Care | Review | 12,4 | 2015 |
| Diagnosis and management of psoriasis | Can. Fam. Phys. | Review | 12,3 | 2017 |
| Electronic Consultations to Improve the Primary Care-Specialty Care Interface for Cardiology in the Medically Underserved: A Cluster-Randomized Controlled Trial | Ann. Fam. Med. | Article | 12,3 | 2016 |
| A systematic review of parent and clinician views and perceptions that influence prescribing decisions in relation to acute childhood infections in primary care | Scand. J. Prim. Health Care | Article | 12,2 | 2015 |
| Estimating the Residency Expansion Required to Avoid Projected Primary Care Physician Shortages by 2035 | Ann. Fam. Med. | Article | 12,0 | 2015 |
| Patterns of regional variation of opioid prescribing in primary care in England: a retrospective observational study | Br. J. Gen. Pract. | Article | 12,0 | 2018 |
| Burnout and Health Care Workforce Turnover | Ann. Fam. Med. | Article | 12,0 | 2019 |
| Inappropriate antibiotic prescription for respiratory tract indications: most prominent in adult patients | Fam. Pr. | Article | 11,8 | 2015 |
| General Practitioners Recognizing Alcohol Dependence: A Large Cross-Sectional Study in 6 European Countries | Ann. Fam. Med. | Article | 11,6 | 2015 |
| Diagnosing cancer in primary care: results from the National Cancer Diagnosis Audit | Br. J. Gen. Pract. | Article | 11,5 | 2018 |
| Clinician Experiences with Screening for Social Needs in Primary Care | J. Am. Board Fam. Med. | Article | 11,5 | 2018 |
| Does mindfulness improve outcomes in patients with chronic pain? Systematic review and meta-analysis | Br. J. Gen. Pract. | Article | 11,4 | 2015 |
| Effective team- based primary care: observations from innovative practices | BMC Fam. Pract. | Article | 11,3 | 2017 |
| Effectiveness of medication review: a systematic review and meta-analysis of randomized controlled trials | BMC Fam. Pract. | Article | 11,3 | 2017 |
| Updated Priorities Among Effective Clinical Preventive Services | Ann. Fam. Med. | Article | 11,0 | 2017 |
| Effectiveness and success factors of educational inhaler technique interventions in asthma & COPD patients: a systematic review | npj Prim. Care Respir. Med. | Review | 11,0 | 2017 |
| Developing Electronic Health Record (EHR) Strategies Related to Health Center Patients' Social Determinants of Health | J. Am. Board Fam. Med. | Article | 11,0 | 2017 |
| Specialization patterns across various youth sports and relationship to injury risk | Physician Sportsmed. | Article | 11,0 | 2017 |
| Burnout and Scope of Practice in New Family Physicians | Ann. Fam. Med. | Article | 11,0 | 2018 |
| Qualitative systematic review of barriers and facilitators to self-management of chronic obstructive pulmonary disease: views of patients and healthcare professionals | npj Prim. Care Respir. Med. | Review | 11,0 | 2018 |
| Emergence of Global Antibiotic Resistance | Primary Care | Review | 11,0 | 2018 |
| A Time-Motion Study of Primary Care Physicians' Work in the Electronic Health Record Era | Fam. Med. | Article | 11,0 | 2018 |
| Efficacy and adverse effects of medical marijuana for chronic noncancer pain Systematic review of randomized controlled trials | Can. Fam. Phys. | Review | 10,8 | 2015 |
| 'Gearing Up' to improve interprofessional collaboration in primary care: a systematic review and conceptual framework | BMC Fam. Pract. | Review | 10,8 | 2016 |
| Vitamin B-12 Deficiency: Recognition and Management | Am. Fam. Physician | Article | 10,7 | 2017 |
| Antibiotic prescribing and patient satisfaction in primary care in England: cross-sectional analysis of national patient survey data and prescribing data | Br. J. Gen. Pract. | Article | 10,5 | 2016 |
| Solo and Small Practices: A Vital, Diverse Part of Primary Care | Ann. Fam. Med. | Article | 10,5 | 2016 |
| A systematic review of chronic disease management interventions in primary care | BMC Fam. Pract. | Review | 10,5 | 2018 |
| Patient-reported side effects, concerns and adherence to corticosteroid treatment for asthma, and comparison with physician estimates of side-effect prevalence: a UK-wide, cross-sectional study | npj Prim. Care Respir. Med. | Article | 10,4 | 2015 |
| Esophageal Cancer | Am. Fam. Physician | Article | 10,3 | 2017 |
| Comparison of brief interventions in primary care on smoking and excessive alcohol consumption: a population survey in England | Br. J. Gen. Pract. | Article | 10,3 | 2016 |
| The Efficacy of Mindfulness-Based Interventions in Primary Care: A Meta-Analytic Review | Ann. Fam. Med. | Review | 10,0 | 2015 |
| Communication Practices and Antibiotic Use for Acute Respiratory Tract Infections in Children | Ann. Fam. Med. | Article | 10,0 | 2015 |
| Primary care clinician antibiotic prescribing decisions in consultations for children with RTIs: a qualitative interview study | Br. J. Gen. Pract. | Article | 10,0 | 2016 |
| The Breathing, Thinking, Functioning clinical model: a proposal to facilitate evidence-based breathlessness management in chronic respiratory disease | npj Prim. Care Respir. Med. | Article | 10,0 | 2017 |
| Delaying and reversing frailty: a systematic review of primary care interventions | Br. J. Gen. Pract. | Review | 10,0 | 2019 |
| Physician Burnout and Higher Clinic Capacity to Address Patients' Social Needs | J. Am. Board Fam. Med. | Article | 10,0 | 2019 |
